# Supplementary material for: Multi-dimensional single-cell characterization revealed suppressive immune microenvironment in AFP-positive hepatocellular carcinoma
Source: Springer Nature journal article supplement (doi:10.1038/s41421-023-00563-x), 2023-06-19
Supplement: MOESM1 [file 41421_2023_563_MOESM1_ESM.pdf]

# Supplementary Information

## Multi-dimensional Single-cell Characterization Revealed Suppressive Immune Microenvironment in AFP-positive Hepatocellular Carcinoma

|                         |       |        |
|-------------------------|-------|--------|
| Supplementary Fig. S1   | ----- | P2-3   |
| Supplementary Fig. S2   | ----- | P4-5   |
| Supplementary Fig. S3   | ----- | P6-8   |
| Supplementary Fig. S4   | ----- | P9-10  |
| Supplementary Fig. S5   | ----- | P11-13 |
| Supplementary Fig. S6   | ----- | P14-15 |
| Supplementary Fig. S7   | ----- | P16-17 |
| Supplementary Table. S1 | ----- | P18-19 |
| Supplementary Table. S2 | ----- | P20-21 |
| Supplementary Table. S3 | ----- | P22    |
| Supplementary Table. S4 | ----- | P23    |
| Supplementary Table. S5 | ----- | P24    |

# Supplementary Figures

Supplementary Fig. S1

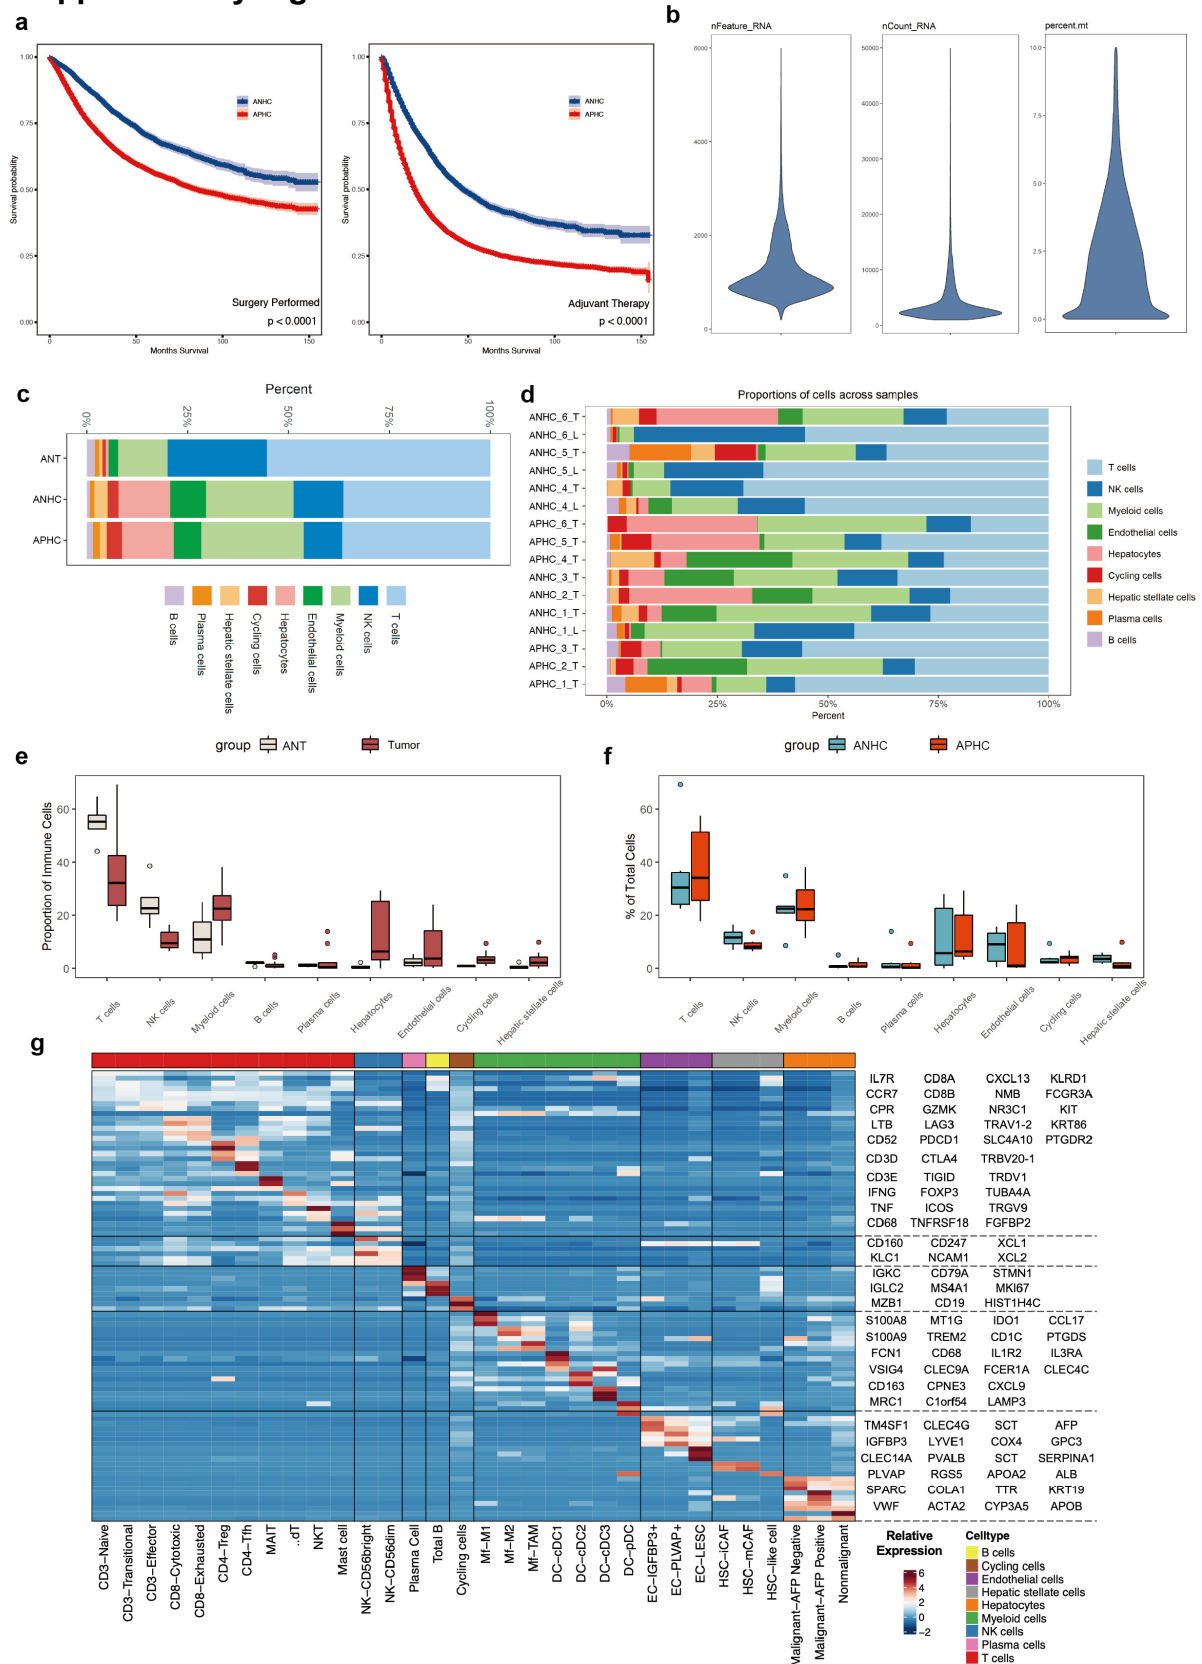

**Supplementary Fig. S1 Subgroup analysis of SEER cohort and details in the scRNA-seq cohort.**

- a Overall survival of patients dispelled as Kaplan-Meier curves according to different subgroups: Surgery performed (left) and adjuvant performed (right).
- b Violin plots showing the number of genes (nFeature\_RNA), number of reads (nCount\_RNA), and percent of mitochondrial-derived transcripts (percent. mt) per single cell after strict quality control.
- c Bar plots showing 9 major cell lineage distributions within different groups. (ANT, adjacent normal tissue; APHC, AFP-Positive HCC; ANHC, AFP-Negative HCC)v
- d Representation of each sample within each major cell type.
- e Boxplot illustrating the fraction of 9 major cell types in tumors and ANT.
- f Boxplot illustrating the fraction of 9 major cell types in ANHC and APHC.
- g Heatmap displaying average expressions of marker genes for 38 cell subsets.

Supplementary Fig. S2

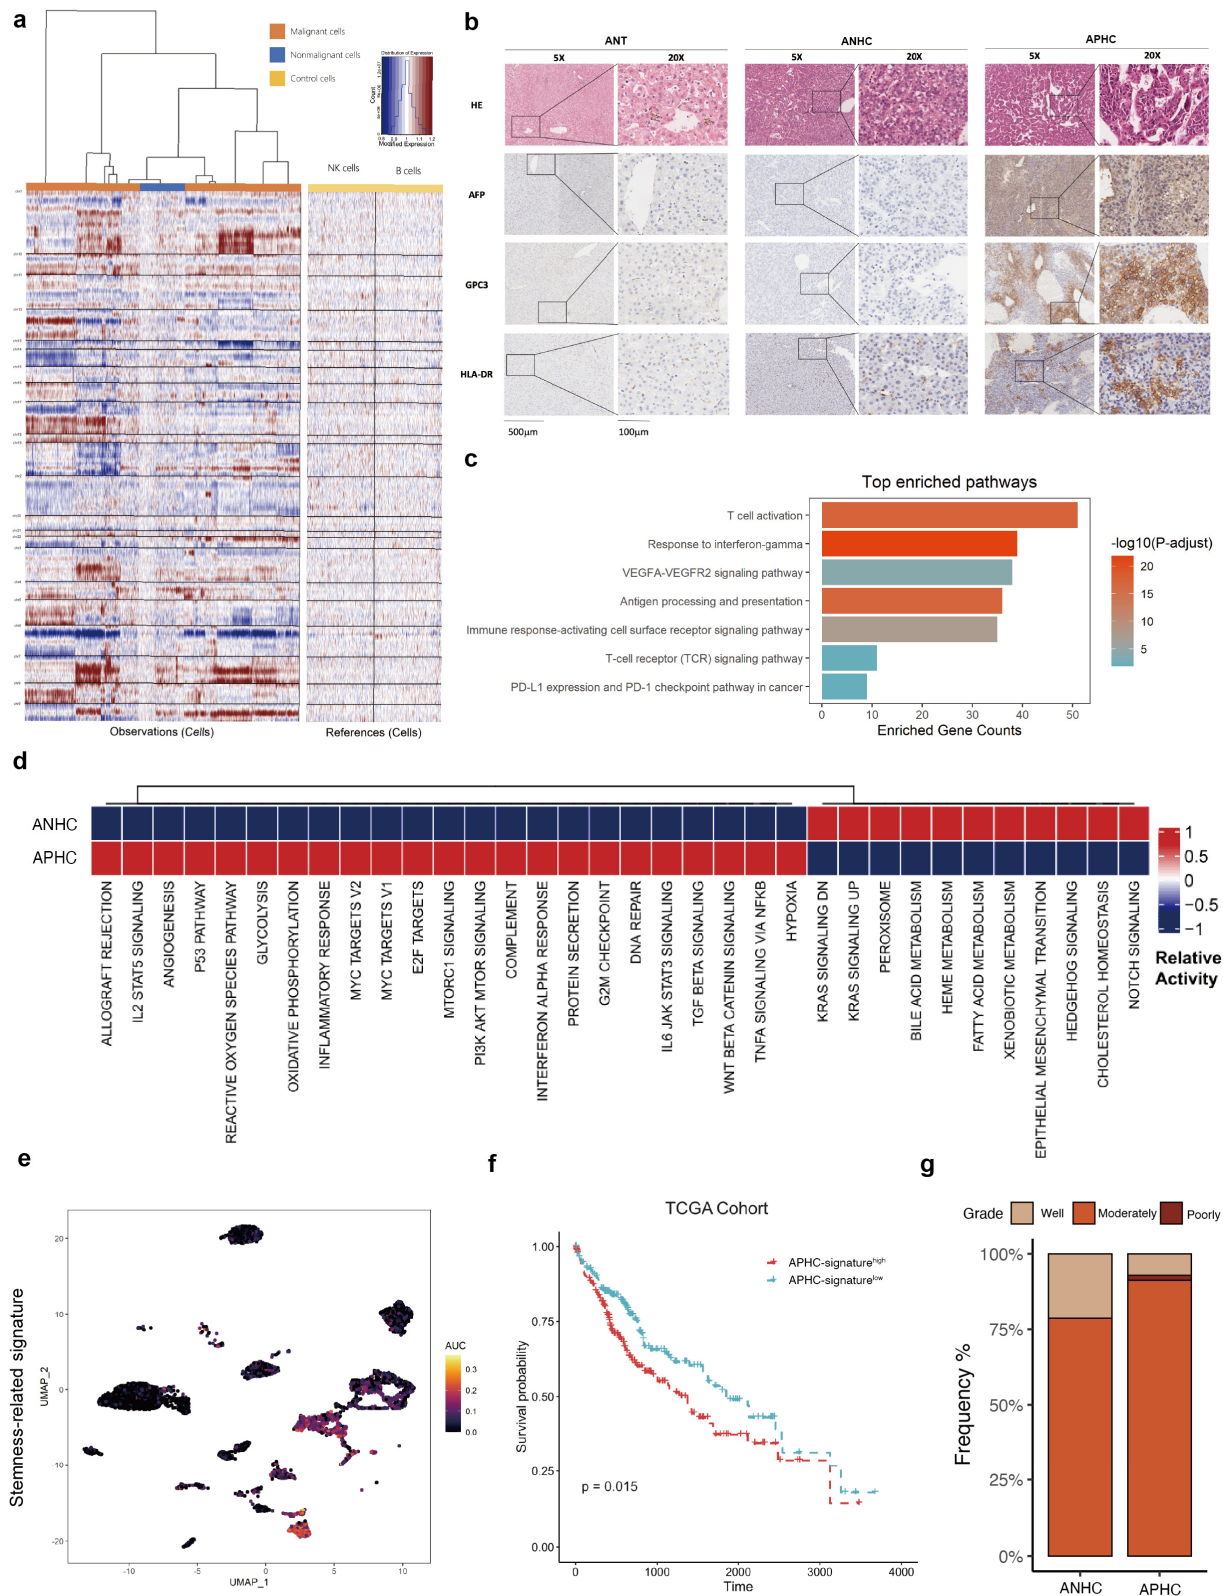



**Supplementary Fig. S2 Characteristics of malignant cells in ANT, ANHC, and APHC.**

- a Heatmap showing CNVs of single cells inferred from scRNA-seq data.
- b The IHC staining of HLA-DR in ANT, ANHC, and APHC.
- c Enriched pathways of HLA-DRA and CD74 double-positive malignant cells.
- d Heatmap showing the difference in pathway activities scored by GSVA per cell between groups.
- e Individual cell AUC score overlay for selected stemness-related genes.
- f Kaplan-Meier plots of overall survival in patients from TCGA dataset defined by APHC-signature.
- g The distribution of HCC with different differentiation between groups based on the EHBH cohort.

**Supplementary Fig. S3-1**

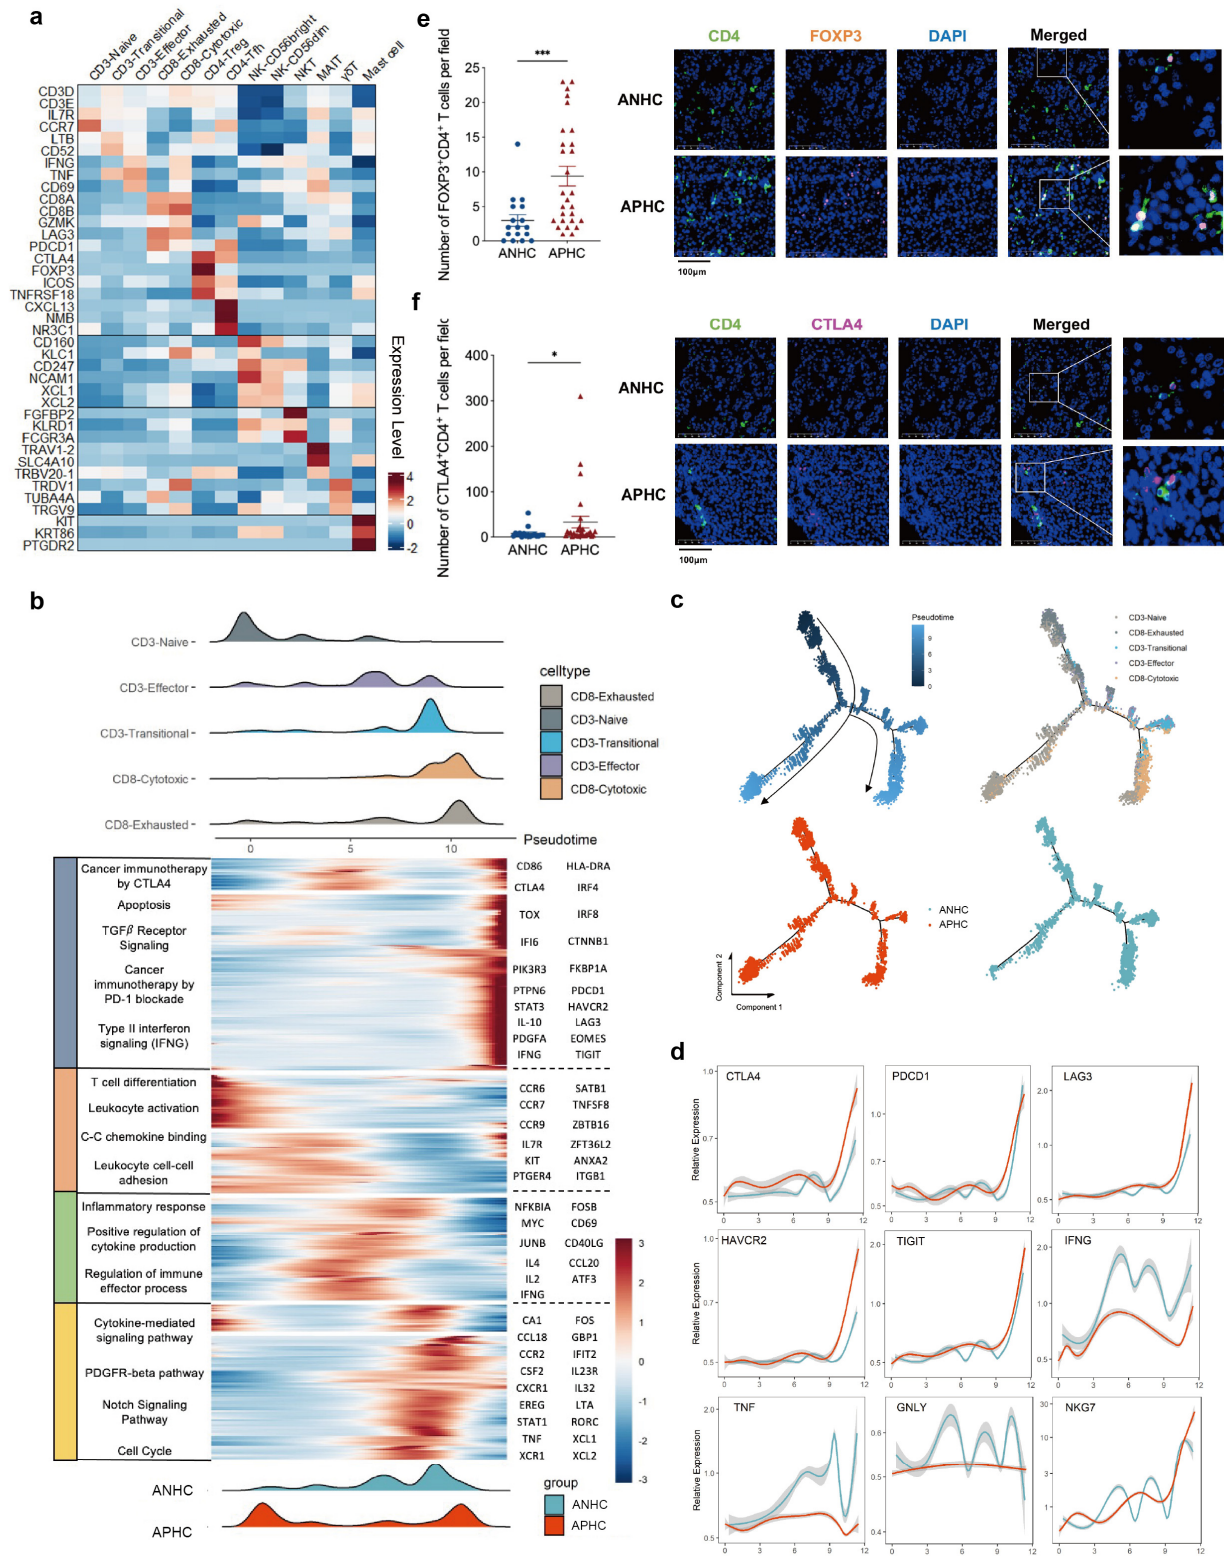

Supplementary Fig. S3-2

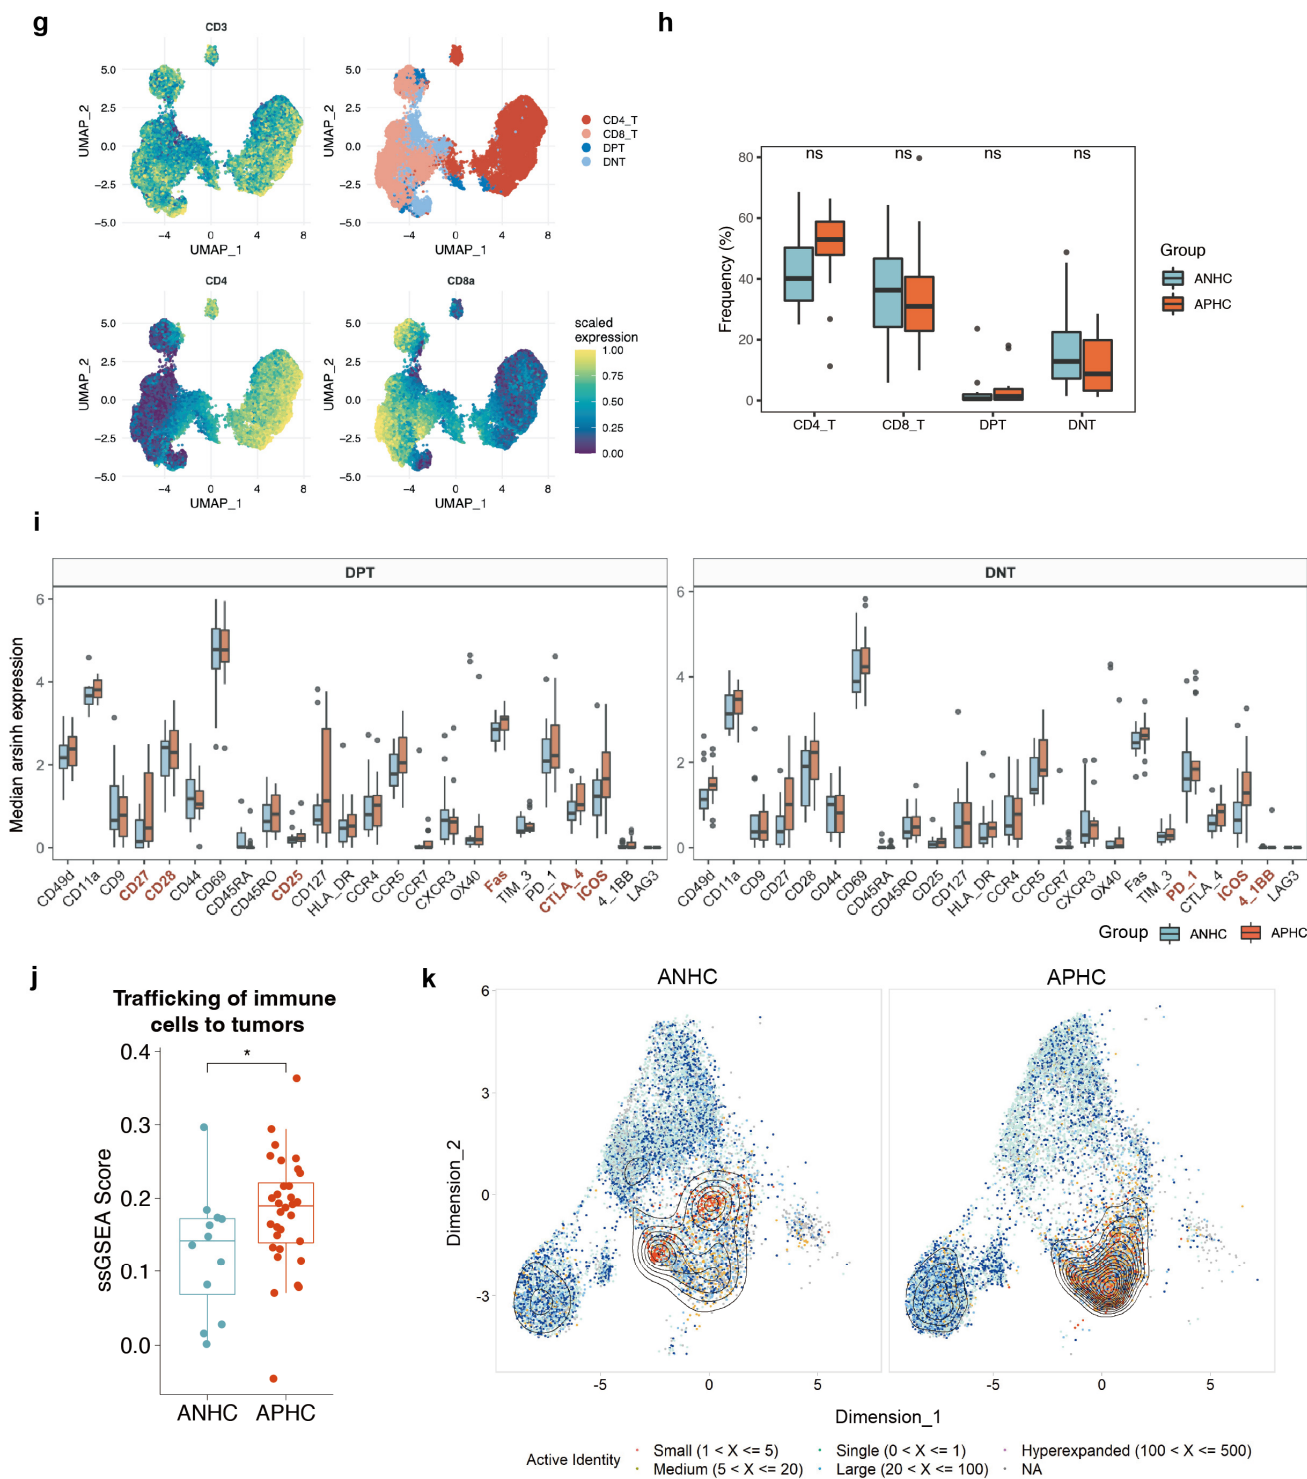

**Supplementary Fig. S3 Analysis of T cell transition and expansion in ANHC and APHC.**

- a Average expression of T/NK cell-specific markers across different cell counterparts.
- b Heatmap showing the dynamic changes in gene expression of total CD8<sup>+</sup> T cells along the pseudotime. The distribution of CD8<sup>+</sup> T subsets (upper panel) and total CD8<sup>+</sup> T across groups (lower panel) along with pseudotime.
- c Two-dimensional graph of the pseudotime-ordered CD8<sup>+</sup> T cells.
- d Two-dimensional plots showing the expression for genes related to T cell function, in ANHC and APHC, along with the pseudotime.
- e The proportions of Tregs between each group and the corresponding representative images.
- f The proportions of CD4<sup>+</sup>CTLA4<sup>+</sup>T cells between each group and the corresponding representative images.
- g UMAP plots showing the identified 4 T-cell subsets in CyTOF datasets. (DPT: double-positive T cells; DNT: double-negative T cells)
- h The distribution of 4 T-cell subsets between groups based on the CyTOF cohort.
- i Relative expression levels of each functional marker of DPT (CD4<sup>+</sup> CD8<sup>+</sup> T cell) and DNT (CD4<sup>-</sup> CD8<sup>-</sup> T cell) across recruited CyTOF cohort.
- j Boxplots showing the level of trafficking signature scored by ssGSEA within the EHBH bulk-RNAseq cohort.
- k Contour density diagram indicating the gradient of the expanded T cell in ANHC and APHC.

### Supplementary Fig. S4

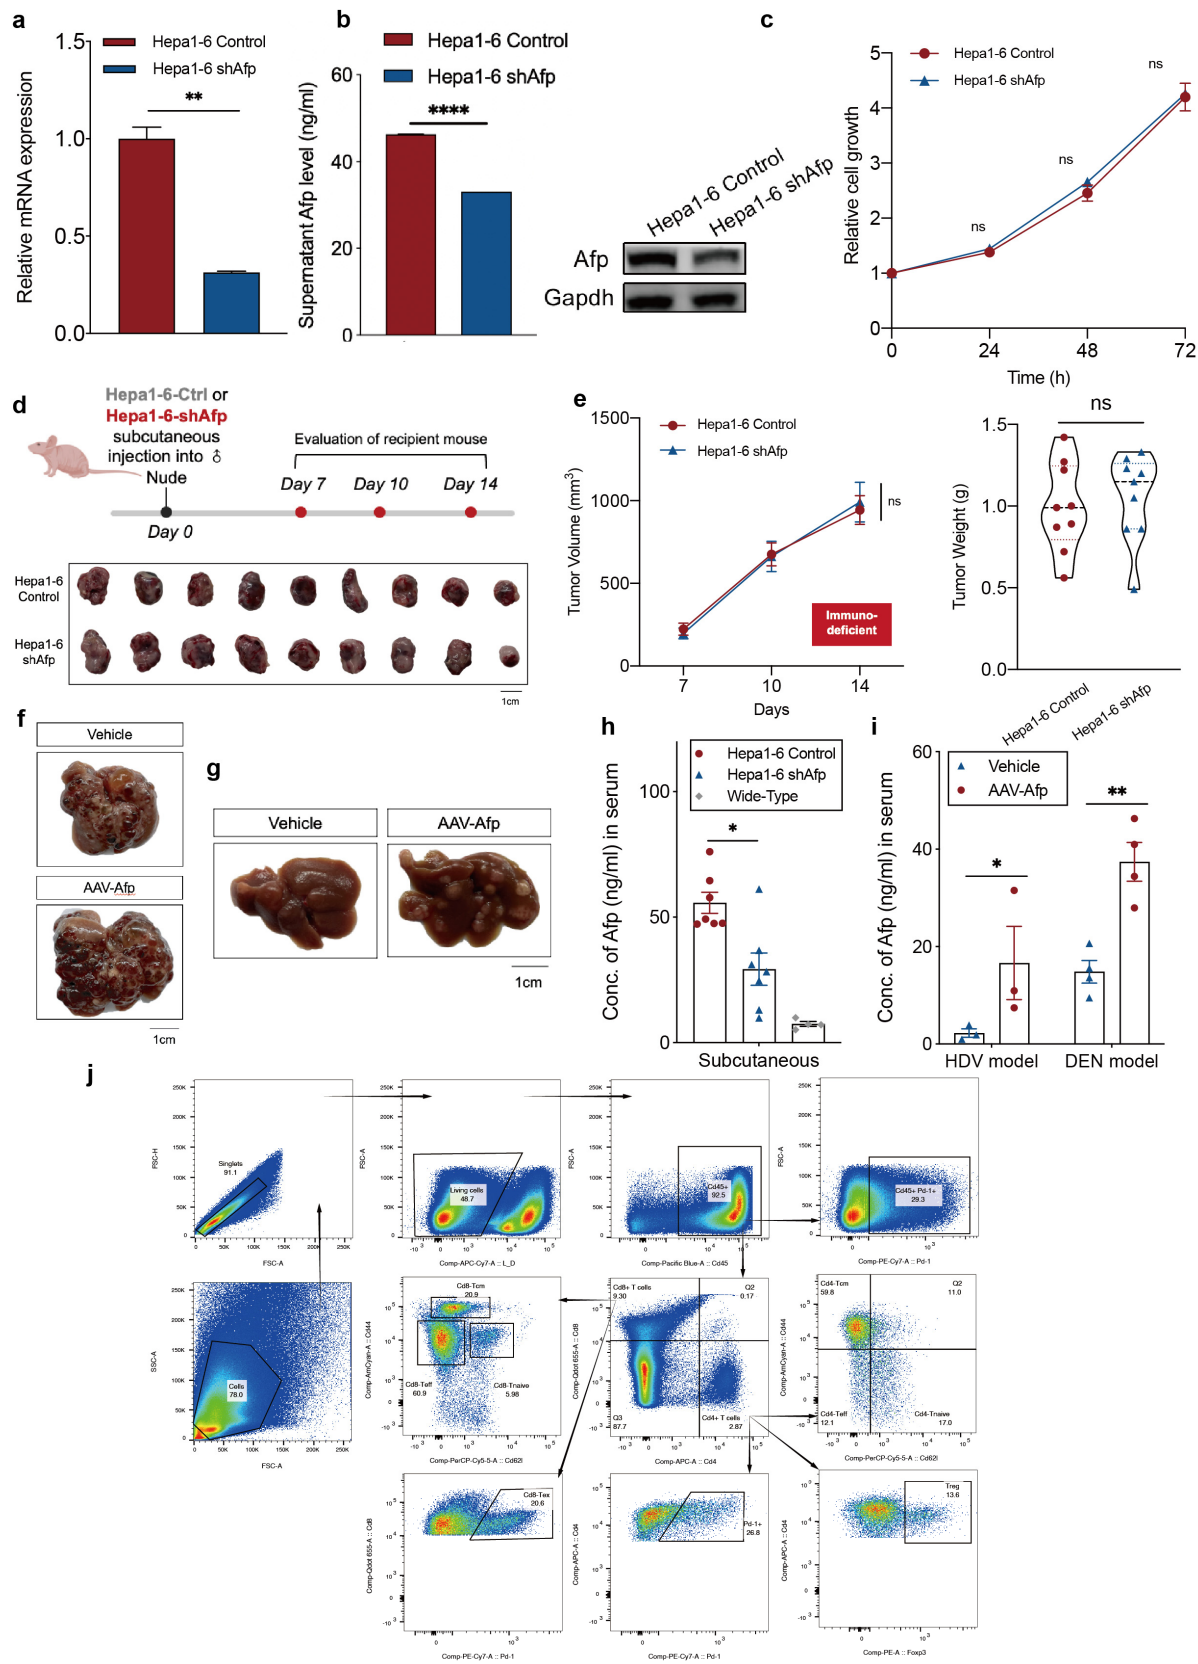

**Supplementary Fig. S4 Afp was involved in modulating the immune microenvironment of HCC.**

- a Afp mRNA levels in Hepa1-6 cells with Afp knockdown.
- b Afp protein levels in Hepa1-6 cells with Afp knockdown (left: secreting; right: total).
- c Relative cell growth curve evaluated by CCK-8 assay.
- d Scheme representing the experimental procedure of the subcutaneous transplantation model in immunodeficient nude mice.
- e Tumor weight and tumor growth curves in immunodeficient nude mice injected subcutaneously with Control or shAfp liver cancer (Hepa1-6) for 3 weeks.
- f Gross morphology of tumors in the hydrodynamic tail vein injection model.
- g Gross morphology of tumors in the DEN plus CCl<sub>4</sub>-induced HCC model.
- h The level of serum Afp in the subcutaneous model.
- i The level of serum Afp in HDV model and DEN model.
- j Gating strategy for separation of different cellular and subcellular populations of T cells under FACS.



## Supplementary Fig. S5-1

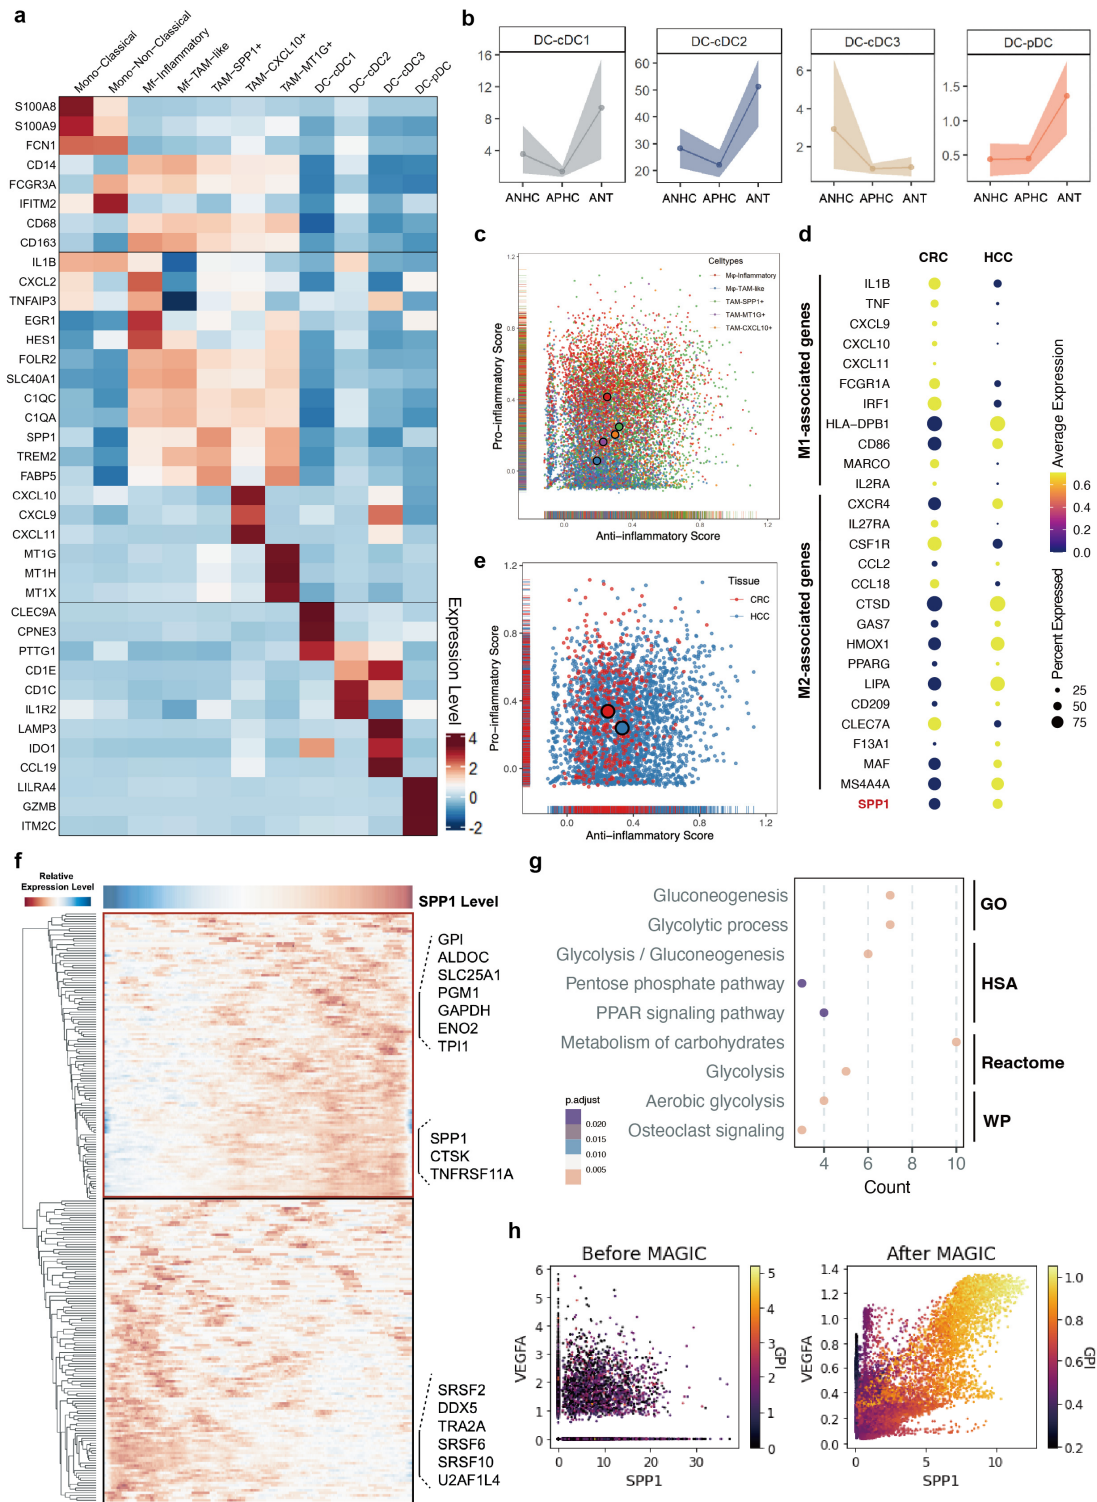



Supplementary Fig. S5-2

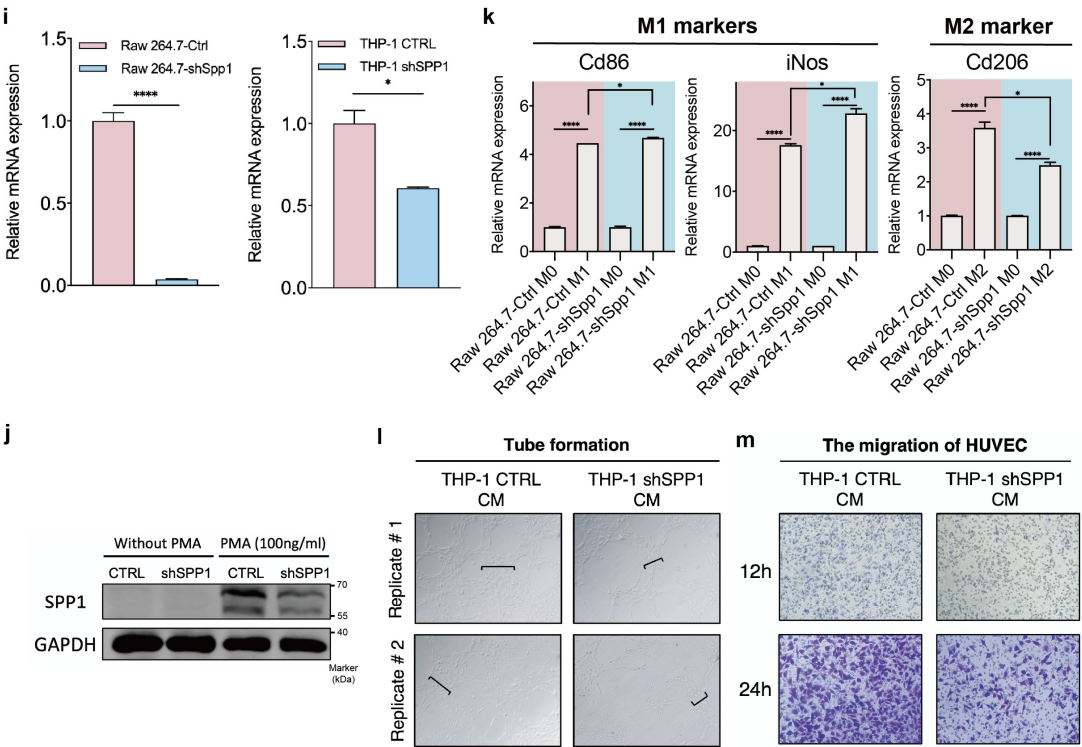

**Supplementary Fig. S5 TAM-SPP1<sup>+</sup> was enriched in APHC.**

- a Heatmap showing average expression of myeloid cell-specific markers across different cell counterparts.
- b Fractional changes for each DC subsets in ANT, ANHC, and APHC.
- c Pro- and anti-inflammatory scores for each macrophage subset within HCC.
- d Average expression of M1 and M2-like macrophage-related genes in SPP1<sup>+</sup>TAM within HCC and CRC (see details in Methods).
- e Pro- and anti-inflammatory scores for SPP1<sup>+</sup>TAM within HCC and CRC.
- f Scaled expression of genes with high knnDREMI conditioned on SPP1 (rows), with cells ordered by SPP1 expression (columns). The red box, the SPP<sup>high</sup> module; the black box, the SPP<sup>low</sup> module.
- g Enriched pathways of cells in SPP<sup>high</sup> module, related to Figure S5c.
- h Two-dimensional scatterplot of the correlation between VEGFA, SPP1, and GPI.  
GPI: Glucose-6-phosphate isomerase.
- i SPP1/Spp1 mRNA levels in THP-1/Raw264.7 with SPP1/Spp1 knockdown.
- j SPP1/Spp1 protein levels in THP-1 with SPP1/Spp1 knockdown.
- k Relative mRNA expression of M1 or M2-associated genes after induced by the corresponding molecule. (M1-like phenotype, LPS [100ng/mL, 48h]; M2-like phenotype, IL-4 [20ng/mL, 48h] & IL-10 [20ng/mL, 48h]).
- l Representative images showing the tube formation of HUVEC and the brackets indicate the thickness of the vessel wall.
- m Representative images showing the migration of HUVEC under different CM.

## Supplementary Fig. S6

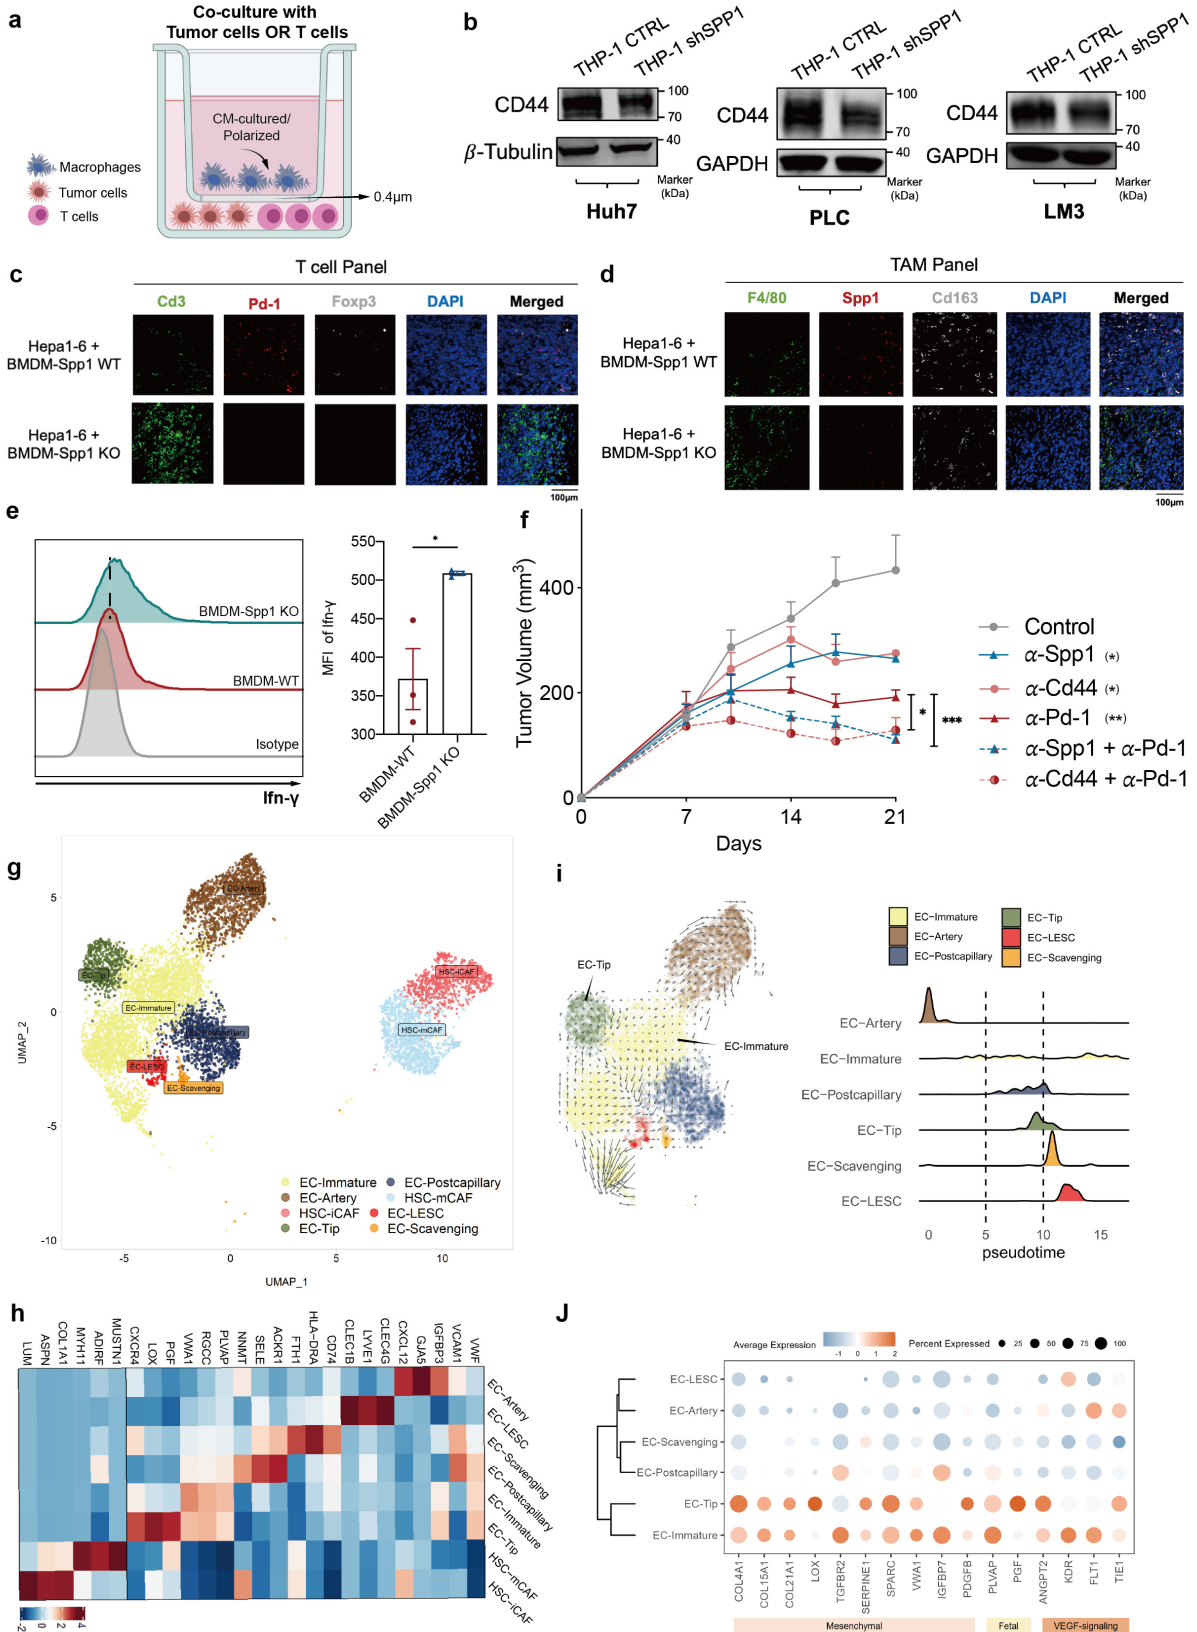

**Supplementary Fig. S6 TAM-SPP1<sup>+</sup> promoted tumor progression via impairing T-cell immunity and the heterogeneity of stromal cells in the tumor microenvironment.**

- a Scheme representing the experimental procedure of in vitro experiments.
- b The relative protein level of CD44 of HCC cell lines after co-cultured with THP-1 CTRL or THP-1 shSPP1 for 24h.
- c Representative multiplex IHC staining of T cells in the subcutaneous co-transplantation model.
- d Representative multiplex IHC staining of TAMs in the subcutaneous co-transplantation model.
- e Mean fluorescence intensity (MFI) of Ifn- $\gamma$  of Cd8<sup>+</sup> T cells co-cultured with indicated BMDM derived from wide type C57BL/6J and Spp1<sup>-/-</sup> C57BL/6J mice relatively. (BMDMs were pre-stimulated with tumor-derived conditioned medium for 24h)
- f The growth curve of an in vivo drug administration model.
- g UMAP plot showing sub-clustering of stromal cells (i.e., HSC and EC)
- h Heatmap showing average expression of stromal cell-specific markers across different cell counterparts.
- i RNA velocity (left) and Monocle2 analysis (right) revealed the potential transition between EC-Tip and EC- Immature.
- j Dot plot showing the average expression of genes associated with matrix remodeling across different clusters.

## Supplementary Fig. S7

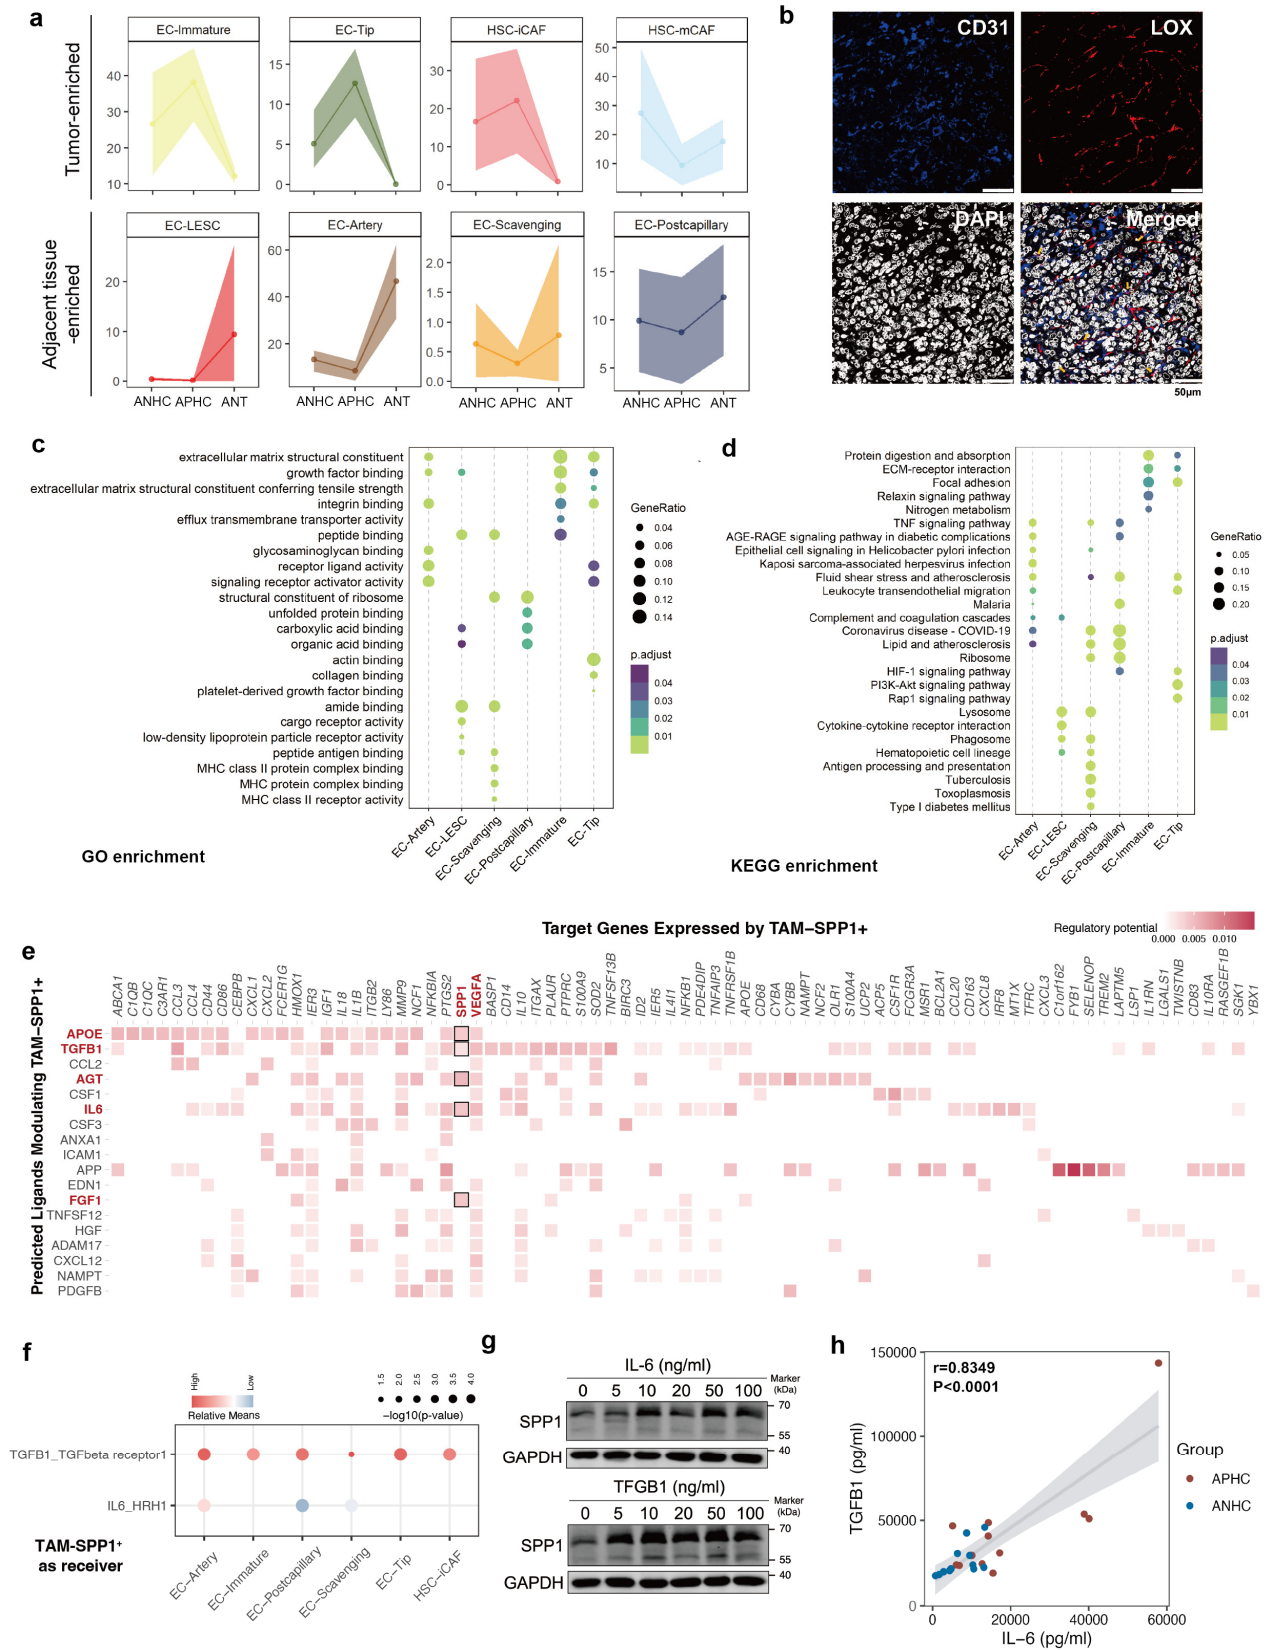

**Supplementary Fig. S7 TGFB1 and IL6 signaling promoted the emergence of TAM-SPP1<sup>+</sup>.**

- a Fractional changes for each HSC and EC subset across groups.
- b The multiplex IHC staining of LOX<sup>+</sup> EC confined the existence of EC-Tips in the tumor microenvironment.
- c Gene ontology (GO) term enrichment analysis of each EC subset.
- d KEGG enrichment analysis of each EC subset.
- e Heatmap showing the potential ligands from stromal cells and the corresponding targeted gene in TAM-SPP1<sup>+</sup>.
- f Ligand-receptor pairs involved in TAM-SPP1<sup>+</sup> activation was predicted by *CellPhoneDB*.
- g TGFB1 (left) or IL6 (right) did not induce SPP1 expression in PMA-stimulated THP-1 in a dose-dependent manner. Protein expression by western blot analysis at 16h after treatment.
- h Correlation of TGFB1 and IL6 from the data obtained from ELISA.

**Supplementary Table. S1 Baseline characteristics of patients with HCC from SEER database**

| Variables                                                 | Overall<br>(n = 55422) | ANHC<br>(n = 13990) | APHC<br>(n = 41432) | P-value |
|-----------------------------------------------------------|------------------------|---------------------|---------------------|---------|
| Age, y                                                    |                        |                     |                     | <0.001* |
| < 60                                                      | 21469 (38.7%)          | 4771 (34.1%)        | 16698 (40.3%)       |         |
| ≥ 60                                                      | 33953 (61.3%)          | 9219 (65.9%)        | 24734 (59.7%)       |         |
| Age at diagnosis, y                                       | 62.0 [56.0;71.0]       | 64.0 [57.0;72.0]    | 62.0 [56.0;70.0]    | <0.001* |
| Gender                                                    |                        |                     |                     | 0.003*  |
| Female                                                    | 12630 (22.8%)          | 3059 (21.9%)        | 9571 (23.1%)        |         |
| Male                                                      | 42792 (77.2%)          | 10931 (78.1%)       | 31861 (76.9%)       |         |
| Grade                                                     |                        |                     |                     | <0.001* |
| Well differentiated; Grade I                              | 5955 (31.0%)           | 2488 (41.9%)        | 3467 (26.1%)        |         |
| Moderately differentiated; Grade II                       | 8676 (45.1%)           | 2644 (44.5%)        | 6032 (45.4%)        |         |
| Poorly differentiated; Grade III                          | 4233 (22.0%)           | 747 (12.6%)         | 3486 (26.2%)        |         |
| Undifferentiated; anaplastic; Grade IV                    | 361 (1.88%)            | 66 (1.11%)          | 295 (2.22%)         |         |
| Fibrosis Score <sup>a</sup>                               |                        |                     |                     | <0.001* |
| F0: Fibrosis 0-4; None to moderate fibrosis               | 2932 (18.4%)           | 979 (22.0%)         | 1953 (17.0%)        |         |
| F1: Fibrosis 5-6; Severe fibrosis or cirrhosis            | 13013 (81.6%)          | 3478 (78.0%)        | 9535 (83.0%)        |         |
| Number of tumors                                          |                        |                     |                     | <0.001* |
| Multiple                                                  | 8328 (15.0%)           | 2599 (18.6%)        | 5729 (13.8%)        |         |
| Single                                                    | 47094 (85.0%)          | 11391 (81.4%)       | 35703 (86.2%)       |         |
| T stage <sup>b</sup>                                      |                        |                     |                     | <0.001* |
| T0                                                        | 30 (0.11%)             | 8 (0.11%)           | 22 (0.11%)          |         |
| T1                                                        | 12309 (44.6%)          | 4367 (58.0%)        | 7942 (39.6%)        |         |
| T2                                                        | 6627 (24.0%)           | 1840 (24.4%)        | 4787 (23.9%)        |         |
| T3a                                                       | 4103 (14.9%)           | 737 (9.78%)         | 3366 (16.8%)        |         |
| T3b                                                       | 3342 (12.1%)           | 398 (5.28%)         | 2944 (14.7%)        |         |
| T3NOS                                                     | 55 (0.20%)             | 12 (0.16%)          | 43 (0.21%)          |         |
| T4                                                        | 1108 (4.02%)           | 171 (2.27%)         | 937 (4.68%)         |         |
| N stage <sup>b</sup>                                      |                        |                     |                     | <0.001* |
| N0                                                        | 25656 (92.0%)          | 7234 (95.3%)        | 18422 (90.7%)       |         |
| N1                                                        | 2243 (8.04%)           | 353 (4.65%)         | 1890 (9.30%)        |         |
| M stage <sup>b</sup>                                      |                        |                     |                     | <0.001* |
| M0                                                        | 26065 (86.4%)          | 7338 (92.0%)        | 18727 (84.4%)       |         |
| M1                                                        | 4092 (13.6%)           | 634 (7.95%)         | 3458 (15.6%)        |         |
| Extension                                                 |                        |                     |                     | <0.001* |
| Confined to liver, without intrahepatic vascular invasion | 25872 (55.8%)          | 7963 (68.0%)        | 17909 (51.7%)       |         |
| Confined to liver, with intrahepatic vascular invasion    | 12952 (28.0%)          | 2721 (23.2%)        | 10231 (29.6%)       |         |
| Major vascular invasion                                   | 5747 (12.4%)           | 701 (5.98%)         | 5046 (14.6%)        |         |
| Extrahepatic metastases                                   | 1757 (3.79%)           | 328 (2.80%)         | 1429 (4.13%)        |         |



|                           |               |              |               |         |
|---------------------------|---------------|--------------|---------------|---------|
| Adjuvant Therapy          |               |              |               | 0.001*  |
| Chemotherapy              | 20893 (82.8%) | 5280 (83.8%) | 15613 (82.4%) |         |
| Radiation                 | 2454 (9.72%)  | 612 (9.72%)  | 1842 (9.73%)  |         |
| Both                      | 1890 (7.49%)  | 405 (6.43%)  | 1485 (7.84%)  |         |
| Surgery                   |               |              |               | <0.001* |
| Surgery performed         | 13650 (24.7%) | 4878 (35.0%) | 8772 (21.2%)  |         |
| Not performed             | 41599 (75.3%) | 9062 (65.0%) | 32537 (78.8%) |         |
| Vital status <sup>c</sup> |               |              |               | 0.000*  |
| Alive                     | 14710 (26.5%) | 5633 (40.3%) | 9077 (21.9%)  |         |
| Deceased                  | 40712 (73.5%) | 8357 (59.7%) | 32355 (78.1%) |         |

**Abbreviation:** HCC, Hepatocellular carcinoma; AFP, Alpha-fetoprotein; NOS, Not otherwise specified

<sup>a</sup> Fibrosis Score is also called Ishak Score

<sup>b</sup> AJCC Cancer Stage 7<sup>th</sup> Edition

<sup>c</sup> Not HCC-specific survival

\* P- value was significant for 0.05

**Supplementary Table. S2 Baseline characteristics of patients with HCC in EHBH cohort**

|                          | <b>Overall<br/>(n = 297)</b> | <b>ANHC<br/>(n = 85)</b> | <b>APHC<br/>(n = 212)</b> | <b>P-value</b> |
|--------------------------|------------------------------|--------------------------|---------------------------|----------------|
| Age, y                   | 47.0 [41.0;56.0]             | 51.0 [43.0;58.0]         | 46.0 [40.0;54.0]          | 0.014*         |
| Gender                   |                              |                          |                           | 0.135          |
| Male                     | 261 (87.9%)                  | 79 (92.9%)               | 182 (85.8%)               |                |
| Female                   | 36 (12.1%)                   | 6 (7.06%)                | 30 (14.2%)                |                |
| Grade                    |                              |                          |                           | 0.022*         |
| Grade II                 | 29 (9.93%)                   | 14 (16.7%)               | 15 (7.21%)                |                |
| Grade III                | 261 (89.4%)                  | 69 (82.1%)               | 192 (92.3%)               |                |
| Grade IV                 | 2 (0.68%)                    | 1 (1.19%)                | 1 (0.48%)                 |                |
| Number of tumors         |                              |                          |                           | 0.107          |
| Multiple                 | 33 (11.1%)                   | 5 (5.88%)                | 28 (13.2%)                |                |
| Single                   | 264 (88.9%)                  | 80 (94.1%)               | 184 (86.8%)               |                |
| Diameter, cm             | 6.00 [4.00;9.00]             | 4.50 [3.50;6.00]         | 7.00 [4.00;10.0]          | <0.001*        |
| Transverse diameter, cm  | 4.50 [3.00;7.00]             | 3.50 [3.00;5.00]         | 5.00 [3.00;7.50]          | <0.001*        |
| Cirrhosis                |                              |                          |                           | 0.100          |
| Negative                 | 83 (27.9%)                   | 30 (35.3%)               | 53 (25.0%)                |                |
| Positive                 | 214 (72.1%)                  | 55 (64.7%)               | 159 (75.0%)               |                |
| Pathology                |                              |                          |                           | <0.001*        |
| Thick trabecular pattern | 235 (79.1%)                  | 54 (63.5%)               | 181 (85.4%)               |                |
| Pseudoglandular pattern  | 8 (2.69%)                    | 7 (8.24%)                | 1 (0.47%)                 |                |
| Clear cell pattern       | 10 (3.37%)                   | 5 (5.88%)                | 5 (2.36%)                 |                |
| Clustered pattern        | 5 (1.68%)                    | 2 (2.35%)                | 3 (1.42%)                 |                |
| Thin trabecular pattern  | 36 (12.1%)                   | 17 (20.0%)               | 19 (8.96%)                |                |
| Solid pattern            | 3 (1.01%)                    | 0 (0.00%)                | 3 (1.42%)                 |                |
| Hemorrhagic necrosis     |                              |                          |                           | 0.225          |

|                         | Overall<br>(n = 297) | ANHC<br>(n = 85) | APHC<br>(n = 212) | P-value |
|-------------------------|----------------------|------------------|-------------------|---------|
| Negative                | 88 (29.6%)           | 30 (35.3%)       | 58 (27.4%)        |         |
| Positive                | 209 (70.4%)          | 55 (64.7%)       | 154 (72.6%)       |         |
| Satellite               |                      |                  |                   | 0.913   |
| Negative                | 154 (51.9%)          | 45 (52.9%)       | 109 (51.4%)       |         |
| Positive                | 143 (48.1%)          | 40 (47.1%)       | 103 (48.6%)       |         |
| MVI                     |                      |                  |                   | 0.508   |
| Negative                | 133 (44.8%)          | 35 (41.2%)       | 98 (46.2%)        |         |
| Positive                | 164 (55.2%)          | 50 (58.8%)       | 114 (53.8%)       |         |
| PVE                     |                      |                  |                   | 0.001*  |
| Negative                | 138 (46.6%)          | 54 (63.5%)       | 84 (39.8%)        |         |
| Thrombus in gross       | 35 (11.8%)           | 6 (7.06%)        | 29 (13.7%)        |         |
| Microscopic thrombus    | 123 (41.6%)          | 25 (29.4%)       | 98 (46.4%)        |         |
| Capsule                 |                      |                  |                   | 0.043   |
| Complete                | 91 (30.6%)           | 35 (41.2%)       | 56 (26.4%)        |         |
| Incomplete              | 78 (26.3%)           | 18 (21.2%)       | 60 (28.3%)        |         |
| No capsule              | 128 (43.1%)          | 32 (37.6%)       | 96 (45.3%)        |         |
| Extrahepatic metastases |                      |                  |                   | 0.646   |
| Negative                | 256 (86.2%)          | 75 (88.2%)       | 181 (85.4%)       |         |
| Positive                | 41 (13.8%)           | 10 (11.8%)       | 31 (14.6%)        |         |

**Abbreviation:** HCC, Hepatocellular carcinoma; AFP, Alpha-fetoprotein; PVE, Portal Vein Embolization; MVI, Microvascular invasion (\* P- value was significant for 0.05)

**Supplementary Table. S3 Summary of patient cohorts for scRNA-seq analysis**

| <b>Case No.</b> | <b>Cell viability of tumors</b> | <b>Cell viability of adjacent normal tissue</b> | <b>Gender</b> | <b>Age</b> | <b>Tumor size (mm)</b> | <b>AFP level (&lt;20 µg/L)</b> | <b>HBV-DNA (&lt;50 IU/ml)</b> | <b>Edmondson stage</b> | <b>MVI Stage</b> | <b>Cirrhosis<sup>a</sup></b> |
|-----------------|---------------------------------|-------------------------------------------------|---------------|------------|------------------------|--------------------------------|-------------------------------|------------------------|------------------|------------------------------|
| APHC_1_T        | 76.80%                          | -                                               | M             | 46         | 117×79                 | > 1210                         | 2.07E+06                      | III                    | M1               | 0                            |
| APHC_2_T        | 77%                             | -                                               | M             | 62         | 98×79                  | > 1210                         | 6.52E+06                      | III                    | M1               | 1                            |
| APHC_3_T        | 88%                             | -                                               | M             | 55         | 104×82                 | > 1210                         | 4.39E+02                      | III                    | M1               | 1                            |
| ANHC_1_T        | 70.30%                          | 82.70%                                          | M             | 47         | 40×31                  | 1.8                            | 2.72E+02                      | III                    | M0               | 0                            |
| ANHC_2_T        | 66%                             | -                                               | M             | 55         | 40×36                  | 8.9                            | < 50                          | III                    | M0               | 0                            |
| ANHC_3_T        | 68.70%                          | -                                               | M             | 54         | 101×88                 | 1.5                            | < 50                          | III                    | M0               | 1                            |
| APHC_4_T        | 75.30%                          | -                                               | F             | 23         | 87×73                  | > 1210                         | 1.76E+04                      | III                    | M0               | 0                            |
| APHC_5_T        | 80%                             | -                                               | F             | 65         | 82×64                  | > 1210                         | < 50                          | III-IV                 | M1               | 0                            |
| APHC_6_T        | 75.30%                          | -                                               | F             | 56         | 135×131                | > 1210                         | < 50                          | III                    | M1               | 1                            |
| ANHC_4_T        | 72%                             | 78%                                             | F             | 66         | 111×106                | 5.4                            | < 50                          | III                    | M0               | 1                            |
| ANHC_5_T        | 78.50%                          | 91%                                             | F             | 69         | 27×24                  | 1.7                            | < 50                          | III                    | M1               | 1                            |
| ANHC_6_T        | 85.30%                          | 86.80%                                          | F             | 51         | 24×20                  | 1.6                            | < 50                          | III                    | M0               | 0                            |

**Supplementary Table. S4 Primers for Real-time quantitative PCR**

| <b>Primer name</b> | <b>Property</b> | <b>Sequence</b>               |
|--------------------|-----------------|-------------------------------|
| SPP1               | Forward primer  | 5'-CTCCATTGACTCGAACGACTC-3'   |
|                    | Reverse primer  | 5-CAGGTCTGCGAAACTTCTTAGAT-3'  |
| CD44               | Forward primer  | 5'-CTGCCGCTTTGCAGGTGTA-3'     |
|                    | Reverse primer  | 5'-CATTGTGGGCAAGGTGCTATT-3'   |
| Spp1               | Forward primer  | 5'-AGCAAGAACTCTTCCAAGCAA-3'   |
|                    | Reverse primer  | 5'-GTGAGATTCGTCAGATTCATCCG-3' |
| Cd86               | Forward primer  | 5'-TGTTTCCGTGGAGACGCAAG-3'    |
|                    | Reverse primer  | 5'-TTGAGCCTTTGTAAATGGGCA-3'   |
| iNOS               | Forward primer  | 5'-GTTCTCAGCCCAACAATACAAGA-3' |
|                    | Reverse primer  | 5'-GTGGACGGGTCGATGTCAC-3'     |
| Cd206              | Forward primer  | 5'-CTCTGTTTCAGCTATTGGACGC-3'  |
|                    | Reverse primer  | 5'-CGGAATTTCTGGGATTCAGCTTC-3' |

**Supplementary Table. S5 Metal-conjugated antibodies used in CyTOF analysis**

| <b>Isotype</b> | <b>Antigen</b> | <b>Clone</b> | <b>Source</b> |
|----------------|----------------|--------------|---------------|
| Pr141          | CD49d          | 9F10         | Fluidigm      |
| Nd142          | CD11a          | HI111        | Fluidigm      |
| Nd143          | CD5            | UCHT2        | Fluidigm      |
| Nd144          | CCR5           | NP-6G4       | Fluidigm      |
| Nd145          | CD4            | RPA-T4       | Fluidigm      |
| Nd146          | CD8a           | RPA-T8       | Fluidigm      |
| Sm147          | CD7            | CD7-6B7      | Fluidigm      |
| Sm148          | CD16           | 3G8          | Fluidigm      |
| Sm149          | CD25           | 2A3          | Fluidigm      |
| Nd150          | OX40           | ACT35        | Fluidigm      |
| Eu151          | CD2            | TS1/8        | Fluidigm      |
| Sm152          | Fas            | DX2          | Fluidigm      |
| Eu153          | TIM-3          | F38-2E2      | Fluidigm      |
| Sm154          | CD45           | HI30         | Fluidigm      |
| Gd155          | PD-1           | EH12.2H7     | Fluidigm      |
| Gd156          | CXCR3          | G025H7       | Fluidigm      |
| Gd158          | CCR4           | L291H4       | Fluidigm      |
| Tb159          | CCR7           | G043H7       | Fluidigm      |
| Gd160          | CD28           | CD28.2       | Fluidigm      |
| Dy161          | CTLA-4         | 14D3         | Fluidigm      |
| Dy162          | CD69           | FN50         | Fluidigm      |
| Dy164          | CD161          | HP-3G10      | Fluidigm      |
| Ho165          | CD45RO         | UCHL1        | Fluidigm      |
| Er166          | CD44           | BJ18         | Fluidigm      |
| Er167          | CD27           | O323         | Fluidigm      |
| Er168          | ICOS           | C398.4A      | Fluidigm      |
| Tm169          | CD45RA         | HI100        | Fluidigm      |
| Er170          | CD3            | UCHT1        | Fluidigm      |
| Yb171          | CD9            | SN4 C3-3A2   | Fluidigm      |
| Yb172          | CD57           | HCD57        | Fluidigm      |
| Yb173          | 4-1BB          | 4B4-1        | Fluidigm      |
| Yb174          | HLA-DR         | L243         | Fluidigm      |
| Lu175          | LAG3           | 11C3C65      | Fluidigm      |
| Yb176          | CD127          | A019D5       | Fluidigm      |
